# Supplementary material
Source: PubMed Central journal article supplement (PMC1283442)

(a) #1 Normal growth

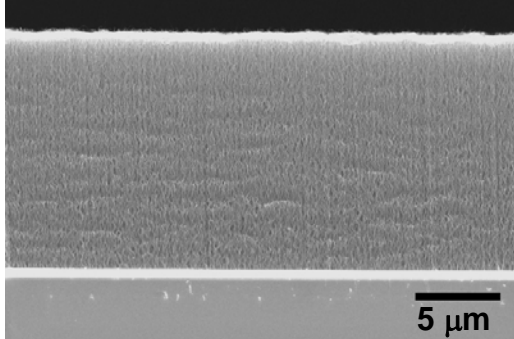

(b) #2 H<sub>2</sub>-free growth

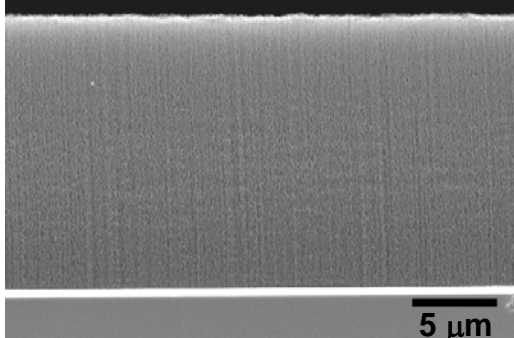

(c) #3 O<sub>2</sub>-free growth

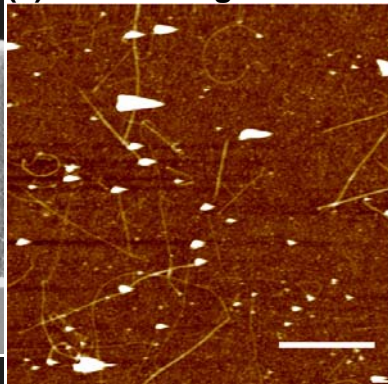

(d) #4 High-H<sub>2</sub> growth

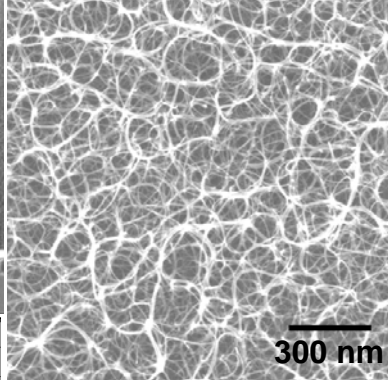

(e) #5 CH<sub>4</sub>-only growth

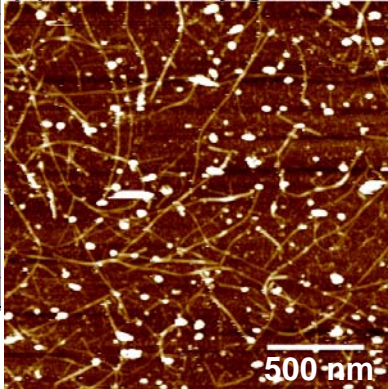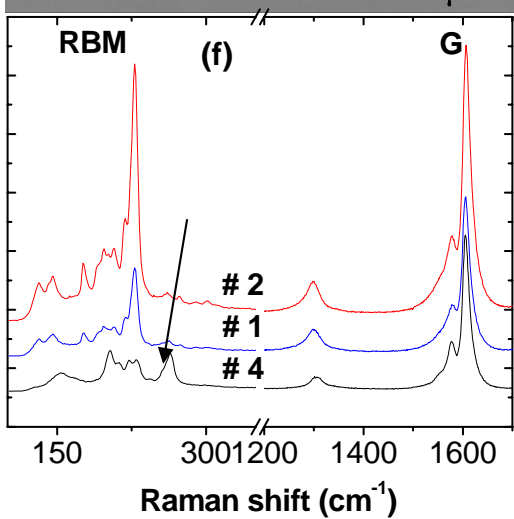

Supplement: pnas_0507064102_2.pdf [file pnas_0507064102_2.pdf]
